# Supplementary material
Source: Springer Nature journal article supplement (https://www.springermedizin.de/resource/supplementary/13045_2012_282_MOESM3_ESM.pdf/9661184)

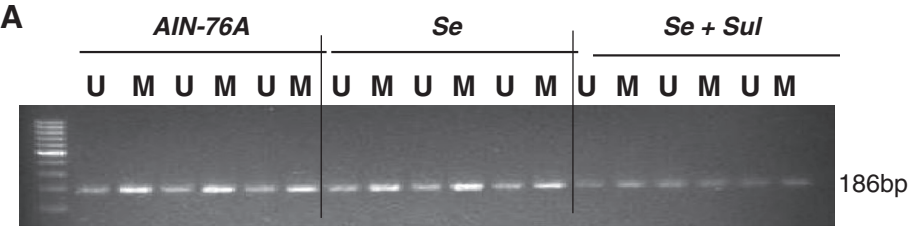

U: unmethylated; M: methylated

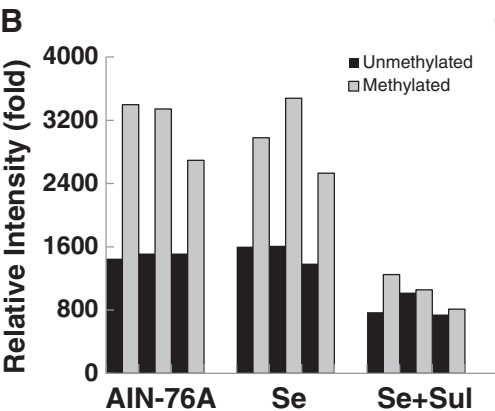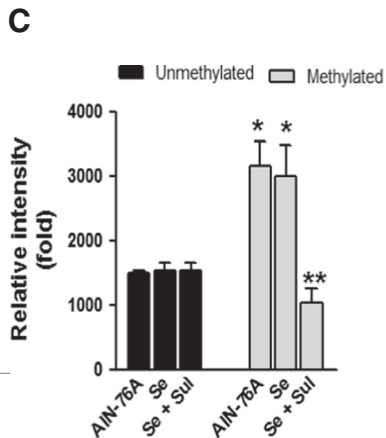

Supplement: MOESM3 [file 9661184]
